# Supplementary material for: Inter- and intra-molecular H-bonds induced different nanostructures from a multi-H-bonding (MHB) amphiphile: nanofibers and nanodisksElectronic supplementary information (ESI) available: experimental data, AFM, SEM images, XRD, FT-IR and CD spectra of gels I and II, and molecular models. See http://www.rsc.org/suppdata/cc/b4/b402956a/
Source: Royal Society of Chemistry journal article supplement (doi:10.1039/b402956a), 2004-01-01

**Electronic Supplementary Information (ESI)**

**Inter- and Intramolecular H-Bonds Induced Different Nanostructures from a Multi-H-Bonding (MHB) Amphiphile: Nanofibers and Nanodisks**

**Peng Gao,a,b Chuanlang Zhan,a,* Lizhu Liu,b Yanbiao Zhou,a Minghua Liua,***

*a CAS Key Laboratory of Colloid and Interface Science, Center for Molecular Science, Institute of Chemistry, The Chinese Academy of Sciences, Beijing 100080, P.R. China*

*b College of Material Science and Engineering ,[Harbin University of Science and Technology](http://www.hrbust.edu.cn/index.asp" \l "%23), Heilongjiang,150080, P.R. China*

Selected characteristic data of C18-Glu: 1H-NMR spectrum (DMSO-d6, , ppm)：1.16 (t, 3H), 1.22 (s, 28H), 1.46 (t, 2H), 1.74 and 1.93 (m, 2H, directly linked to chiral center), 2.09 (m, 2H), 2.28 (m, 2H, directly linked to carboxyl), 4.18 (m, 1H, chiral center), 8.05 (d, 1H, -NH-). Elemental analysis: Calculated for C23H43NO5:C, (66.79); H, (10.48); N, (3.39). Found: C, (66.50); H, (10.58); N, (3.57).

For measurements of AFM, SEM, Circular Dichroism (CD), and FT-IR and temperature-dependent 1H-NMR spectra, and X-ray diffraction (XRD), the samples were prepared as follows. Upon heating, a freshly cleaved mica or silicon or silica or CaF2 plate was put into the solvent mixed with C18-Glu and was then allowed to cool down to the room temperature. The organogels were *in-situ* prepared onto the above substrates and subjected for the above measurements. For measurements of temperature-dependent 1H-NMR spectra, either the organogel **I** formed with CDCl3 or the xerogel **II** suspended in CDCl3 in a NMR tube was used.

**Fig. 1.** 1H-NMR spectrum of the xerogel **II** suspended in CDCl3 at 334 K. In which the peaks at 3.7 and 4.2 ppm are all corresponding to the proton of chiral center. The separation of chiral center supports the strong interaction between inter-molecules through amide and carboxylic acid groups.

**
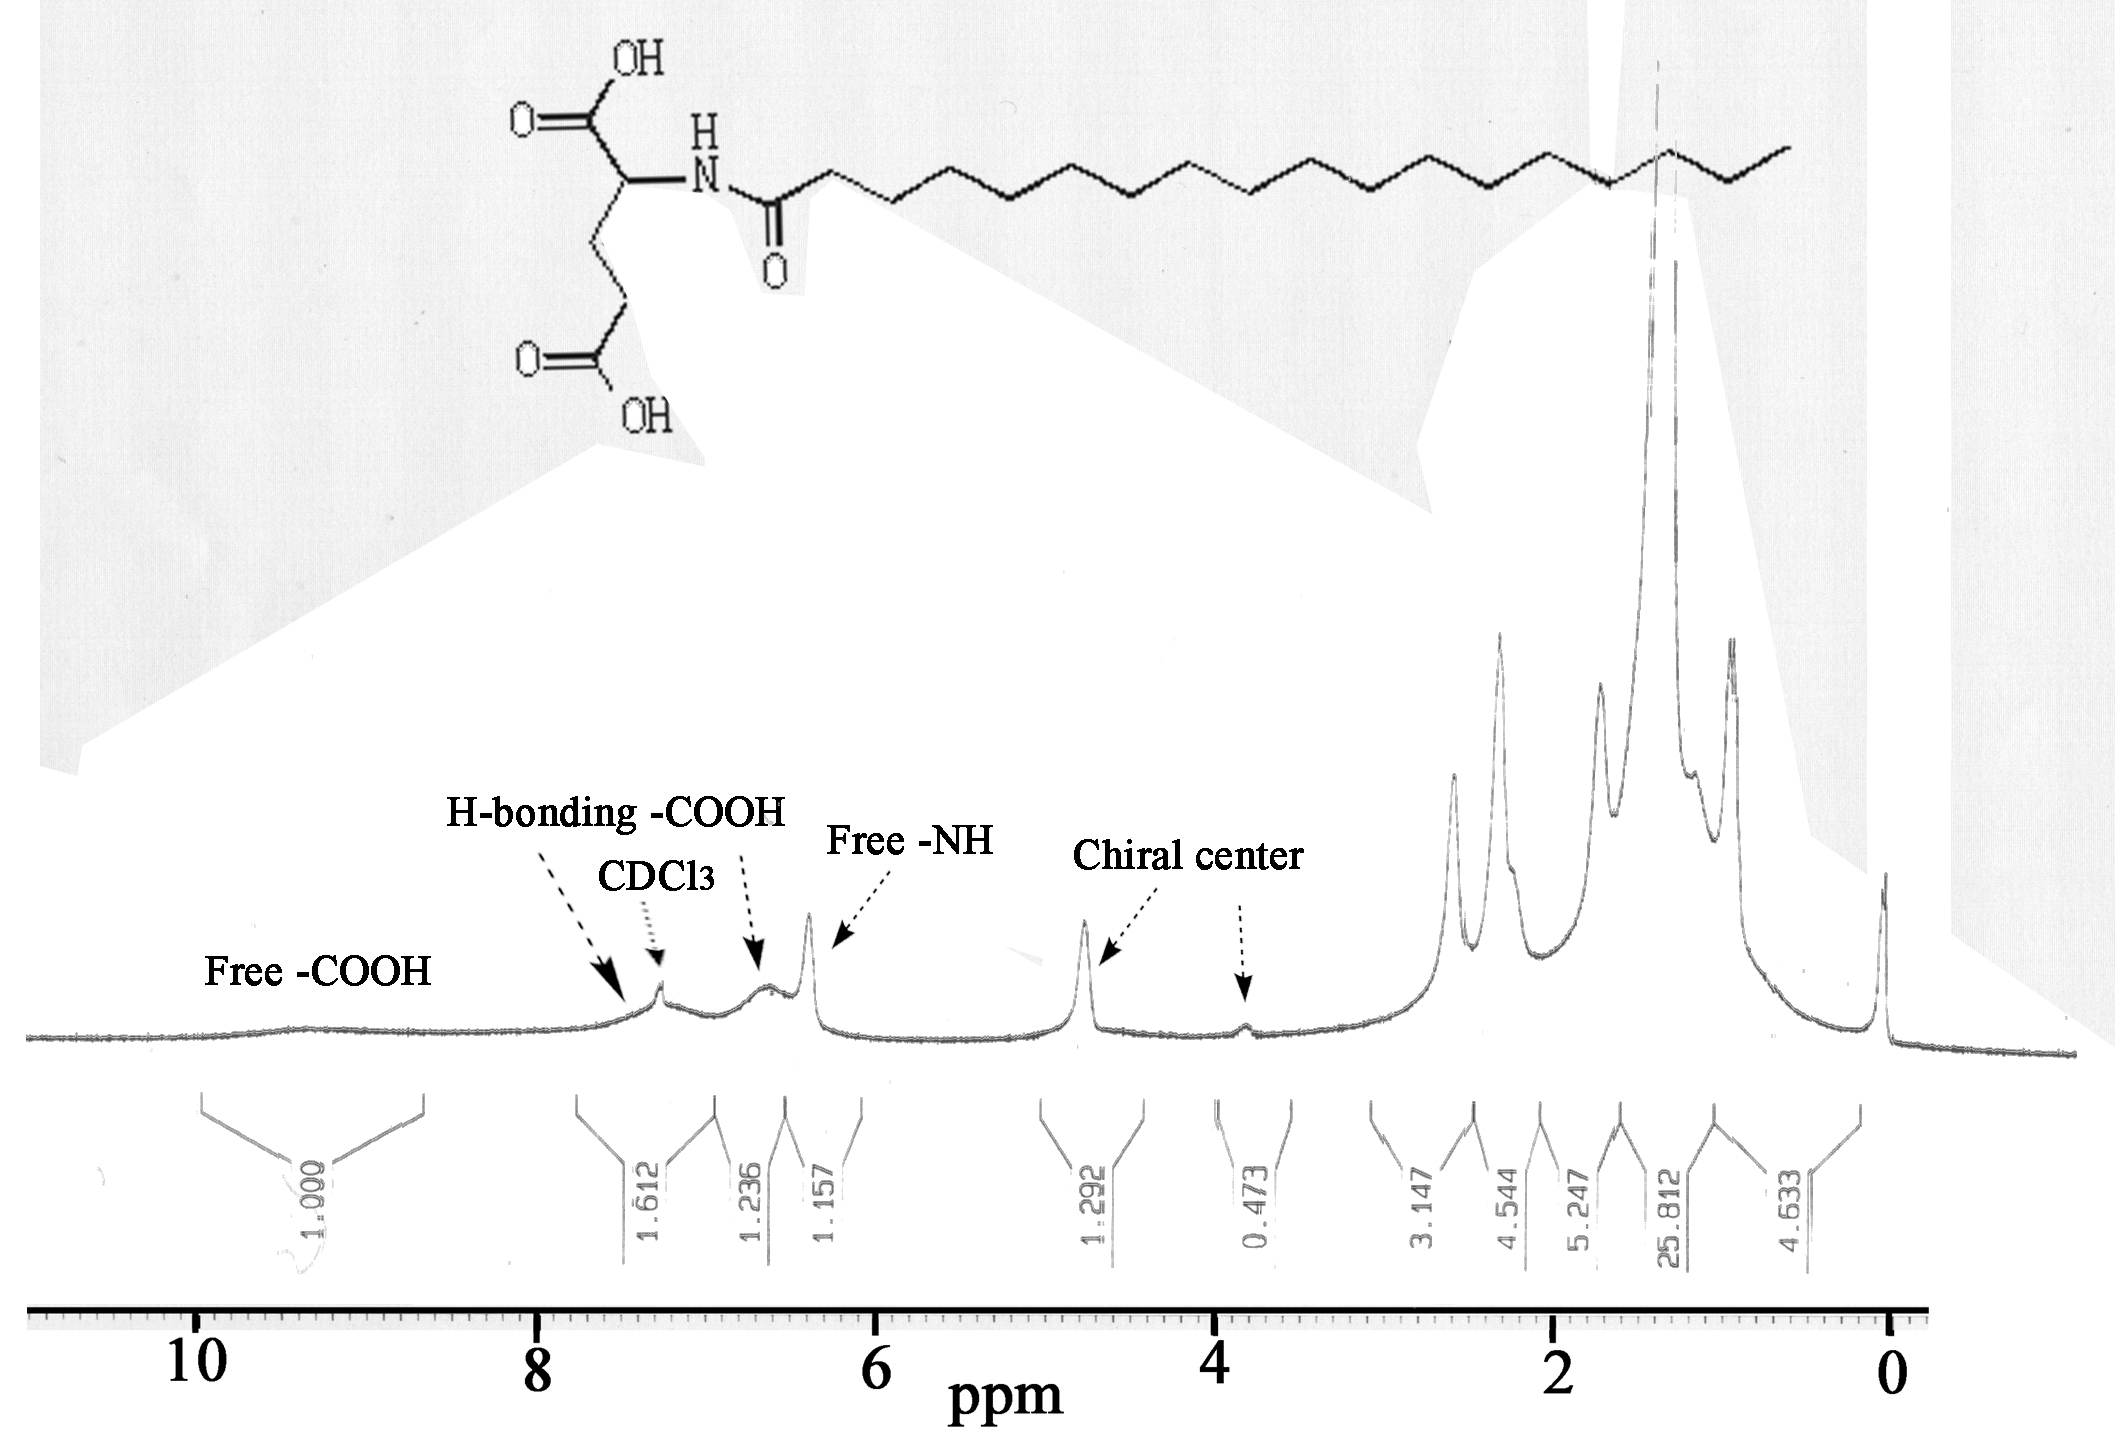
**

**Fig. 2.** Additional SEM and AFM height images of nanofibers of the organogel **I** from chloroform.


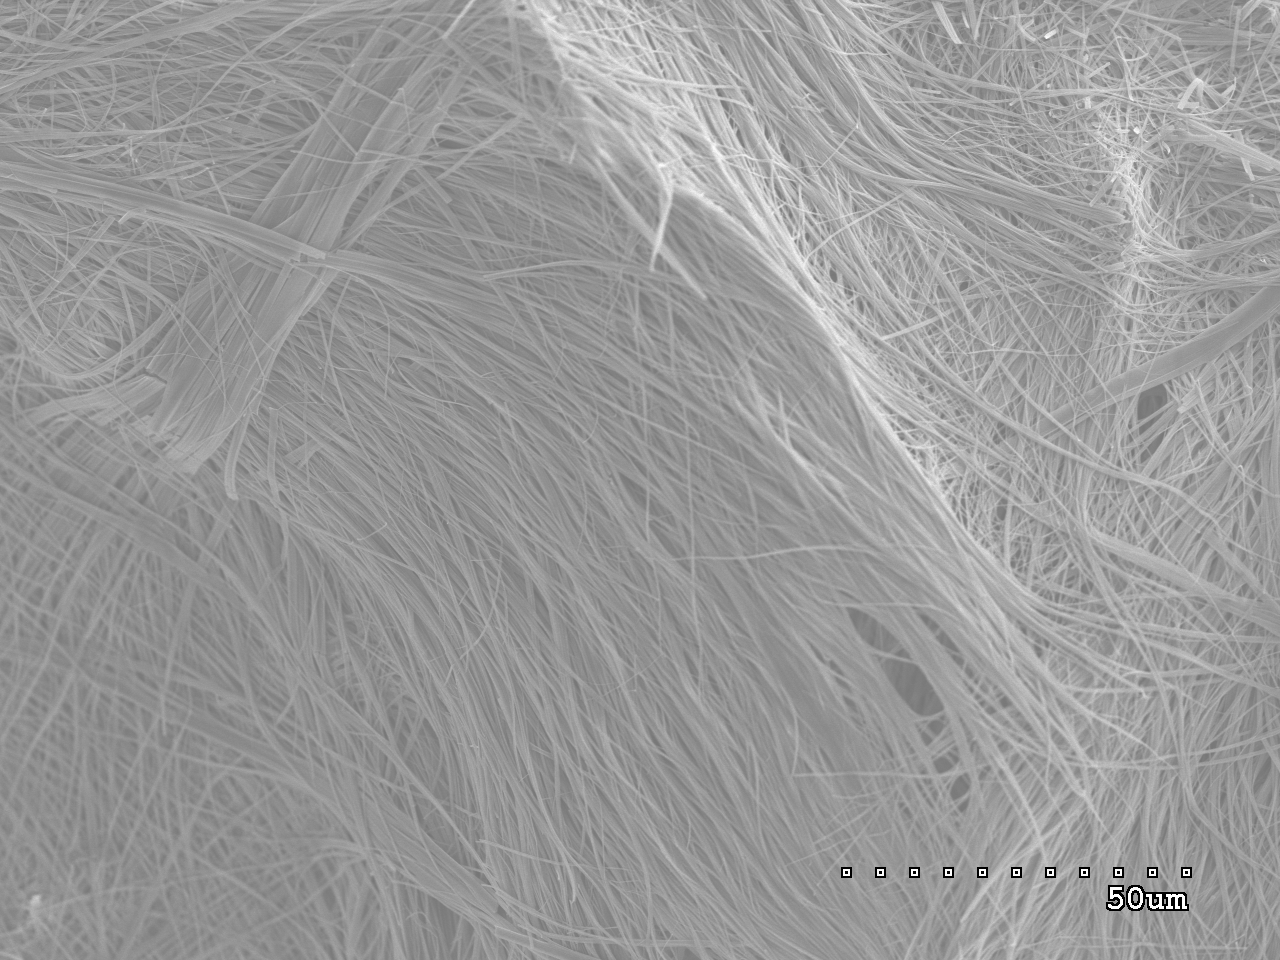


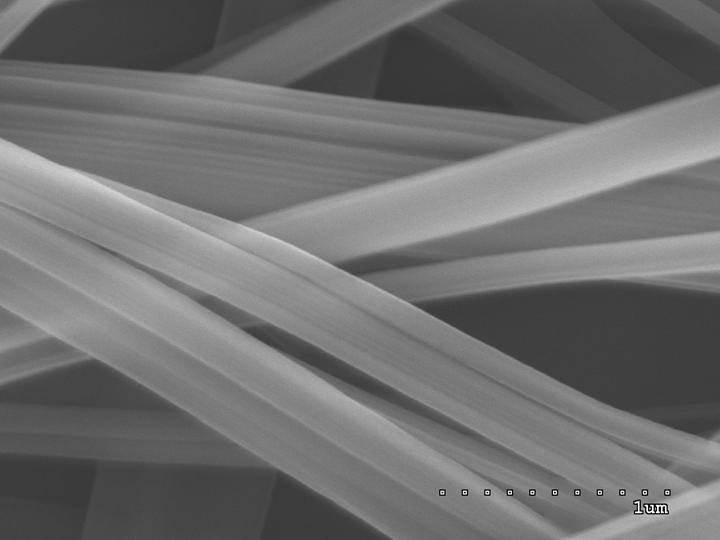

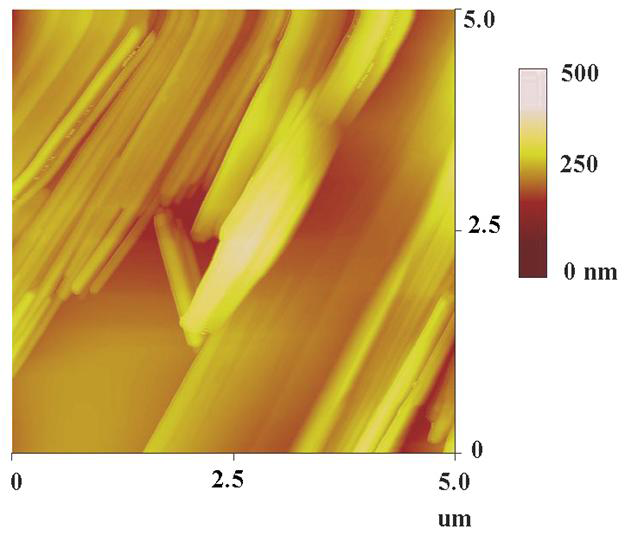


**Fig. 3.** XRD patterns of xerogels **I** and **II** of C18-Glu formed from 1:1 mixed water/ethanol (a) and chloroform (b), respectively.


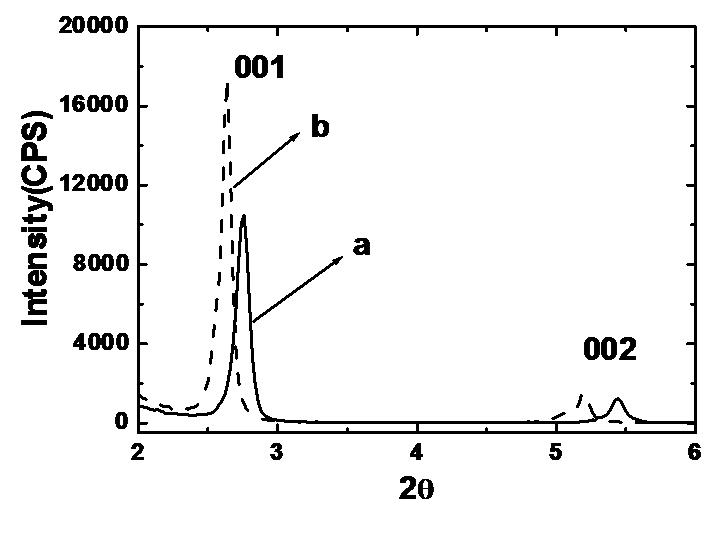


**Fig. 4.** FT-IR spectra of xerogels **I** and **II** of C18-Glu formed from 1:1 mixed water/ethanol (a) and chloroform (b), respectively.


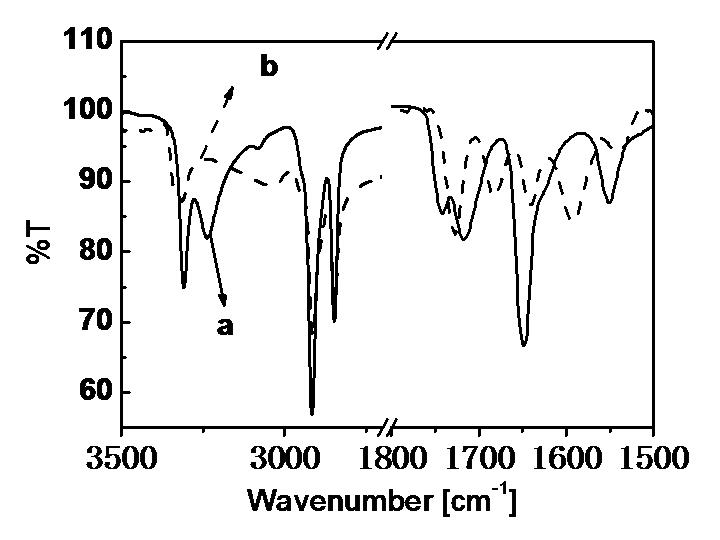

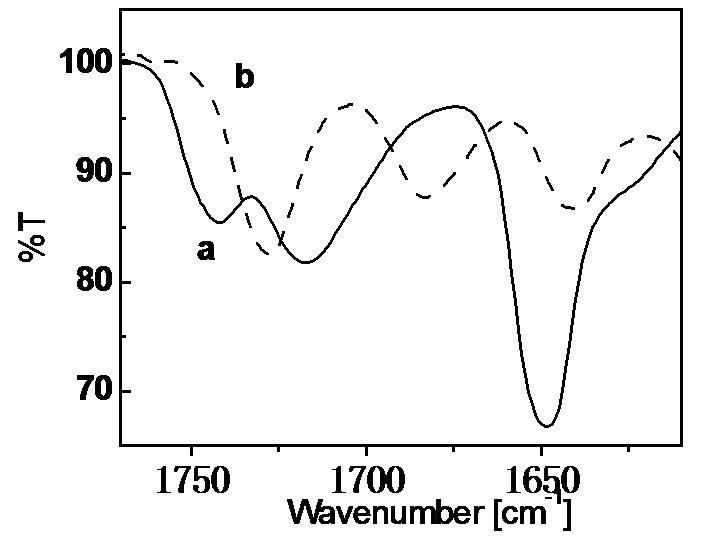


**Fig.5.** CD spectra of xerogels **I** and **II** of C18-Glu formed from 1:1 mixed water/ethanol (a) and chloroform (b), respectively.


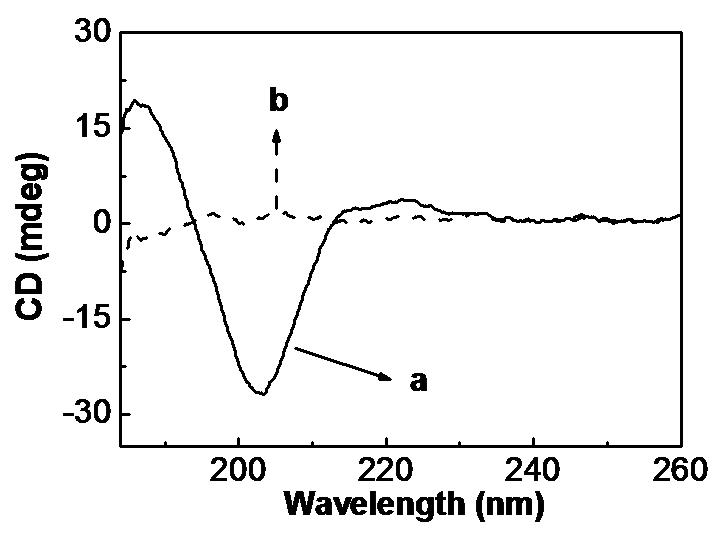


**Fig. 6**. PCMODEL minimizing energies and structures for two kinds of intramolecular H-bonds between amid and –COOH and between –COOH groups, from which one can see that kind I is stable compared to kind II in molecular energy.


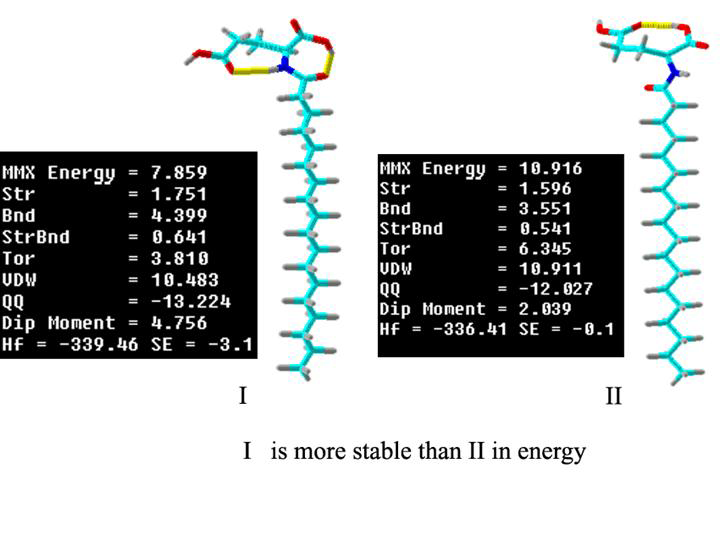

Supplement: b402956a.doc [file b402956a.doc]
